# Supplementary material for: Empagliflozin is associated with improvements in liver enzymes potentially consistent with reductions in liver fat: results from randomised trials including the EMPA-REG OUTCOME® trial
Source: PubMed Central journal article supplement (PMC6133166; doi:10.1007/s00125-018-4702-3), 2018-07-31
Supplement: 125_2018_4702_MOESM1_ESM.pdf [file 125_2018_4702_MOESM1_ESM.pdf]

**Empagliflozin is associated with improvements in liver enzymes potentially consistent with reductions in liver fat: results from randomised trials including the EMPA-REG OUTCOME® trial (Sattar N et al.)**

**Electronic supplementary material (ESM)**

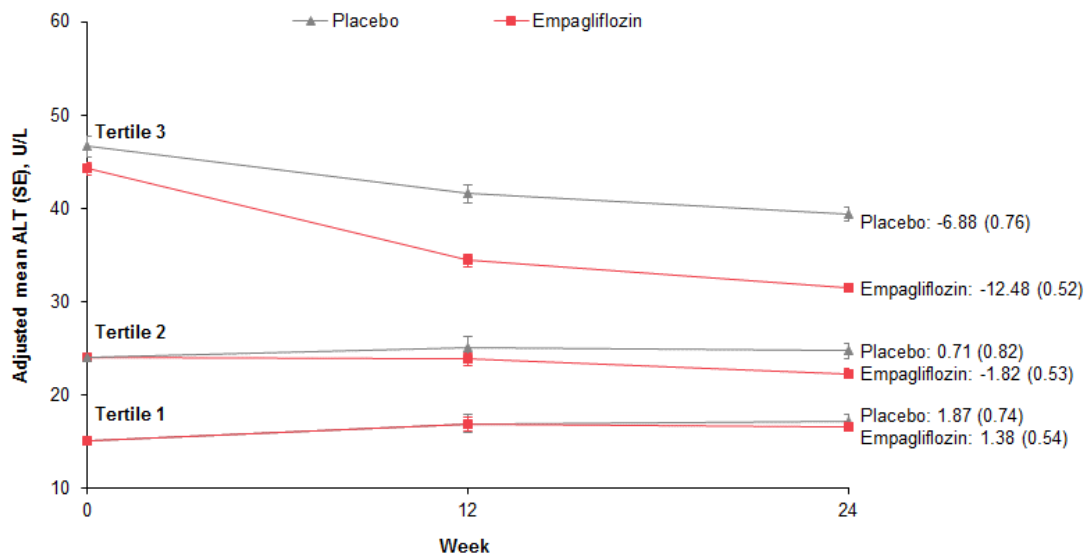

|                   | 0   | 12  | 24  |
|-------------------|-----|-----|-----|
| <b>Tertile 3</b>  |     |     |     |
| Placebo (n)       | 286 | 283 | 260 |
| Empagliflozin (n) | 515 | 510 | 487 |
| <b>Tertile 2</b>  |     |     |     |
| Placebo (n)       | 228 | 227 | 207 |
| Empagliflozin (n) | 519 | 514 | 499 |
| <b>Tertile 1</b>  |     |     |     |
| Placebo (n)       | 261 | 258 | 242 |
| Empagliflozin (n) | 554 | 549 | 523 |

**ESM Figure 1.** Changes in alanine aminotransferase (ALT) in pooled 24-week trial data in tertiles by baseline ALT. Mixed model repeated measures analysis in patients treated with  $\geq 1$  dose of study drug based on observed cases, including values after initiation of rescue medication. Baseline values are mean (SE). SE, standard error.

a

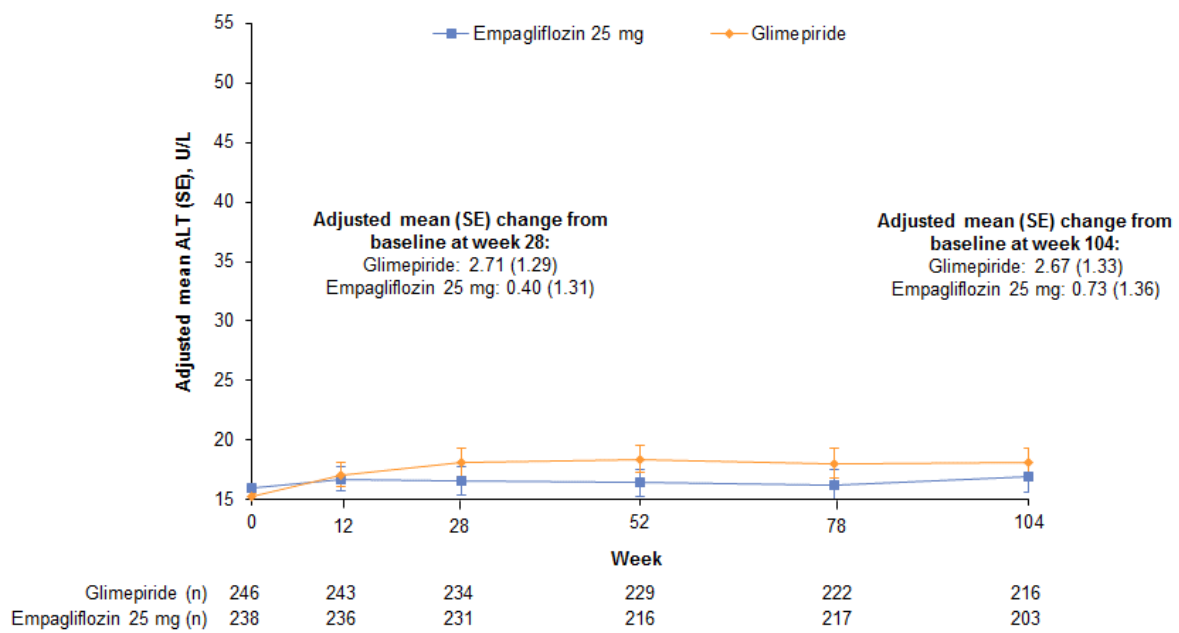

b

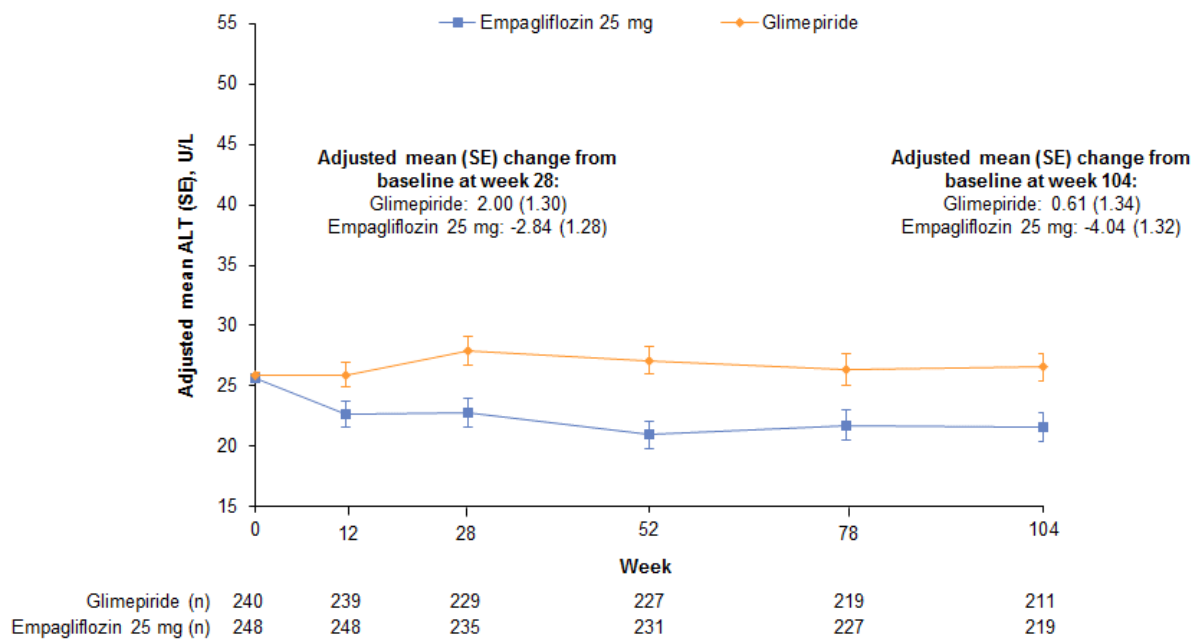

C

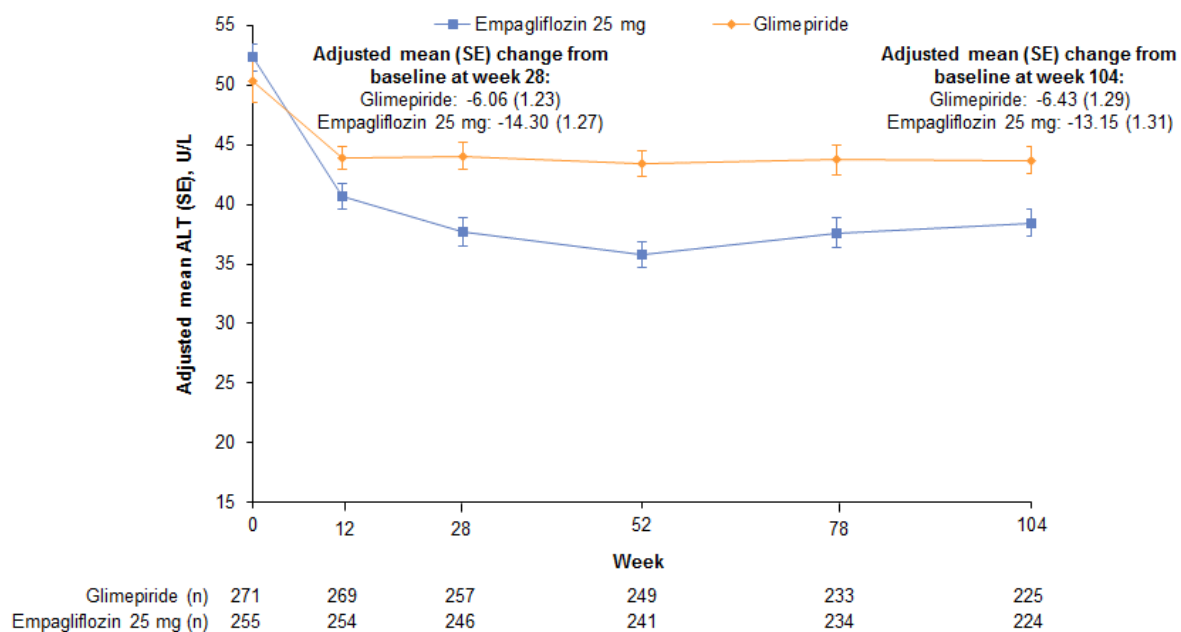

**ESM Figure 2.** Changes in alanine aminotransferase (ALT) in the EMPA-REG H2H-SU trial in tertiles of patients by baseline ALT: (a) tertile 1; (b) tertile 2; (c) tertile 3. Mixed model repeated measures analysis in patients treated with  $\geq 1$  dose of study drug based on observed cases, including values after initiation of rescue medication. Baseline values are mean (SE). SE, standard error.

a

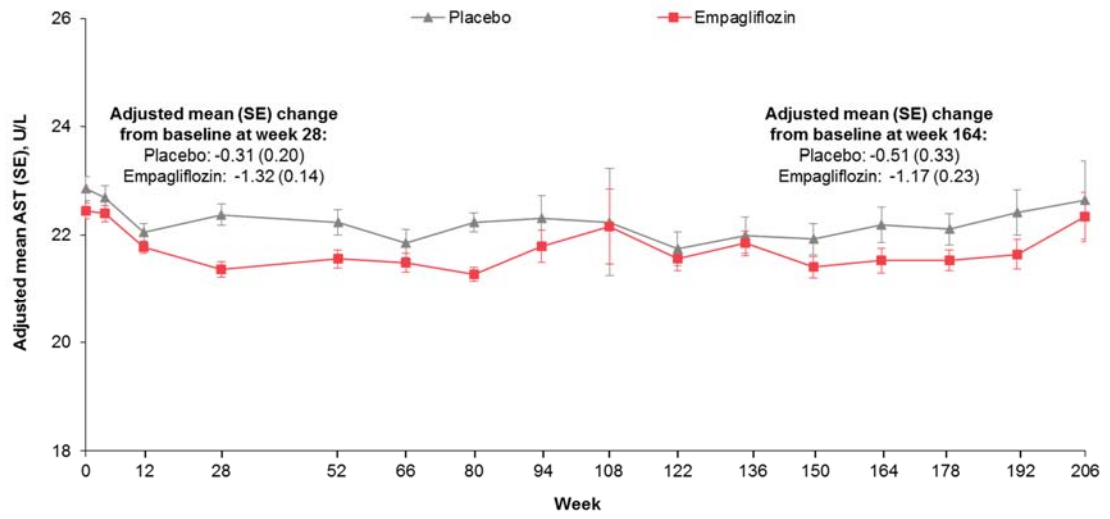

|                   |      |      |      |      |      |      |      |      |      |      |      |      |      |     |     |
|-------------------|------|------|------|------|------|------|------|------|------|------|------|------|------|-----|-----|
| Placebo (n)       | 2312 | 2217 | 2146 | 2041 | 1973 | 1902 | 1844 | 1629 | 1351 | 1146 | 1009 | 877  | 617  | 362 | 129 |
| Empagliflozin (n) | 4611 | 4426 | 4330 | 4154 | 4058 | 3957 | 3865 | 3418 | 2876 | 2466 | 2195 | 1912 | 1425 | 905 | 330 |

b

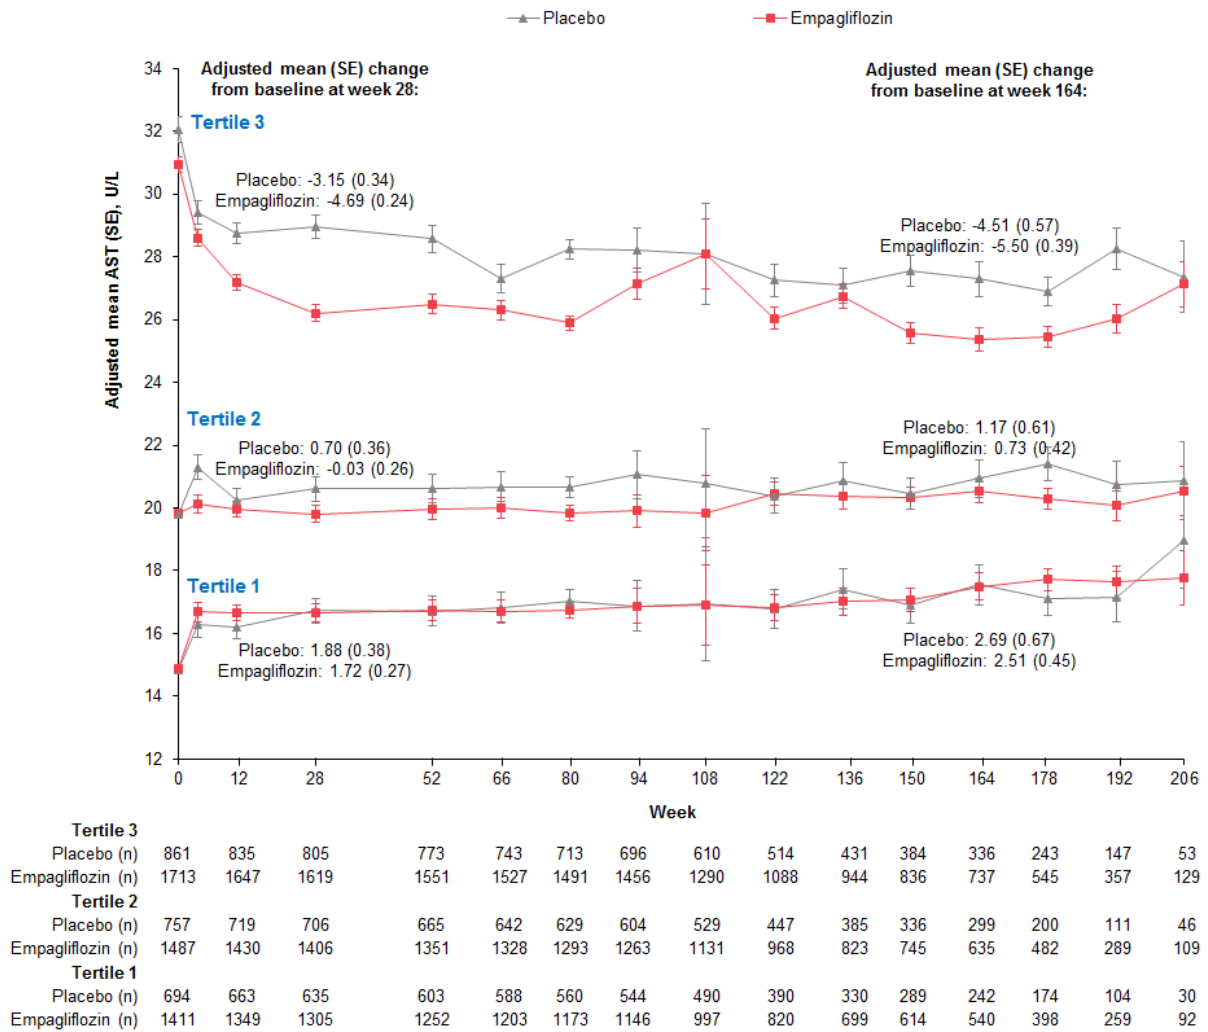

**ESM Figure 3.** Changes in aspartate aminotransferase (AST) in the EMPA-REG OUTCOME<sup>®</sup> trial in (a) all patients and (b) tertiles by baseline AST. Mixed model repeated measures analysis in patients treated with  $\geq 1$  dose of study drug based on observed cases, including values after initiation of rescue medication.

a

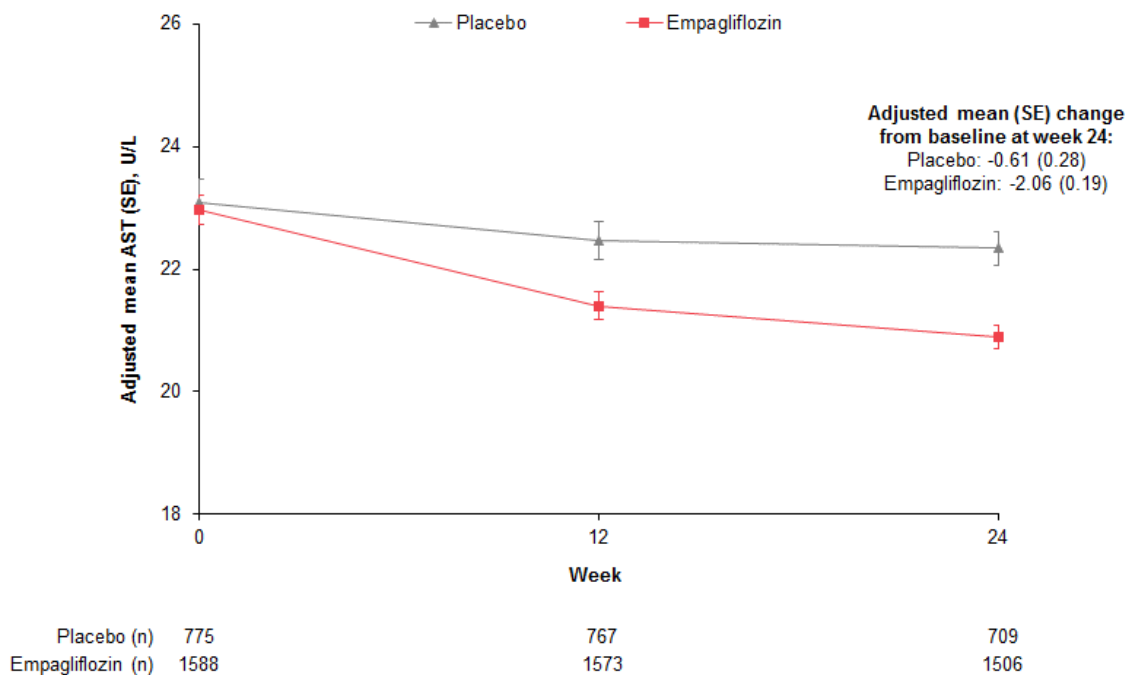

b

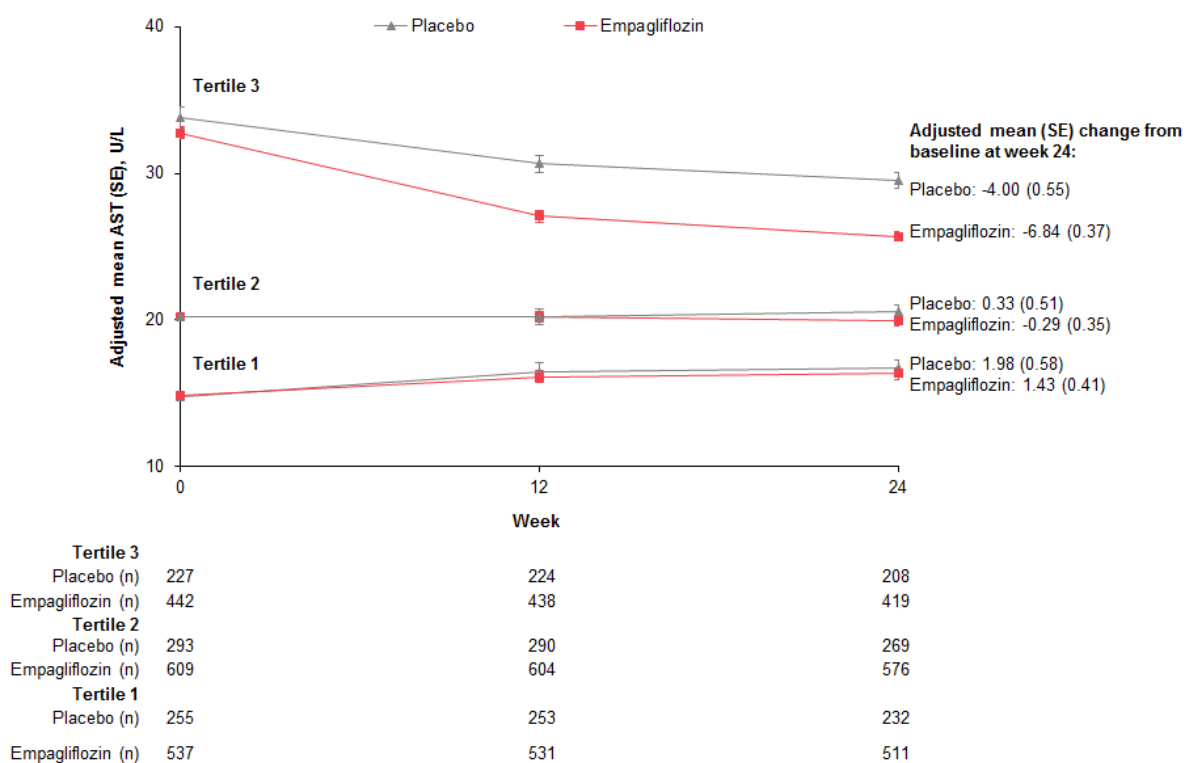

**ESM Figure 4.** Changes in aspartate aminotransferase (AST) in pooled 24-week trial data in (a) all patients and (b) tertiles of patients by baseline ALT. Mixed model repeated measures analysis in patients treated with  $\geq 1$  dose of study drug based on observed cases, including values after initiation of rescue medication. Baseline values are mean (SE). SE, standard error.

**a**

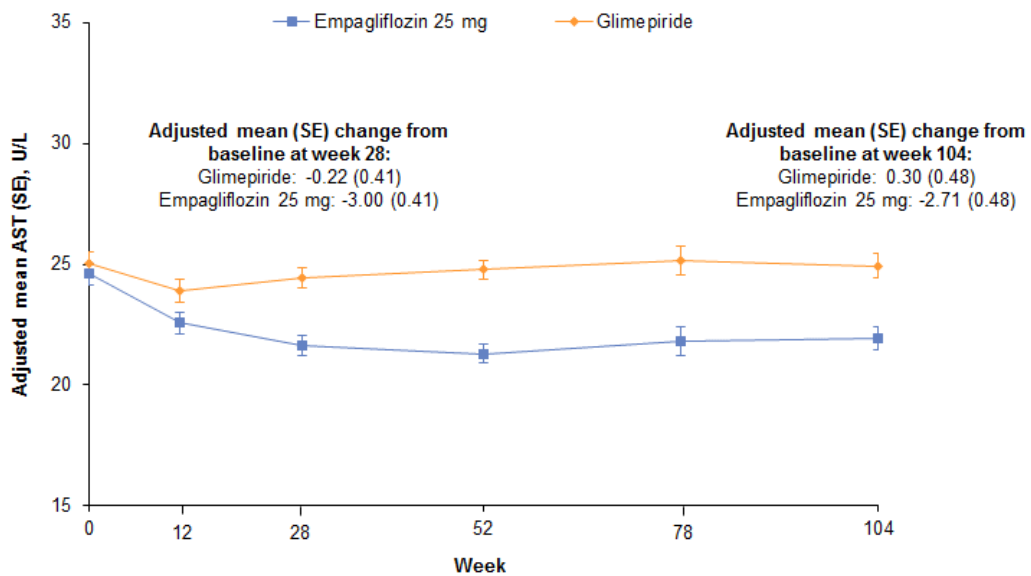

|                         |     |     |     |     |     |     |
|-------------------------|-----|-----|-----|-----|-----|-----|
| Empagliflozin 25 mg (n) | 741 | 738 | 708 | 687 | 678 | 646 |
| Glimepiride (n)         | 757 | 751 | 720 | 703 | 674 | 653 |

**b**

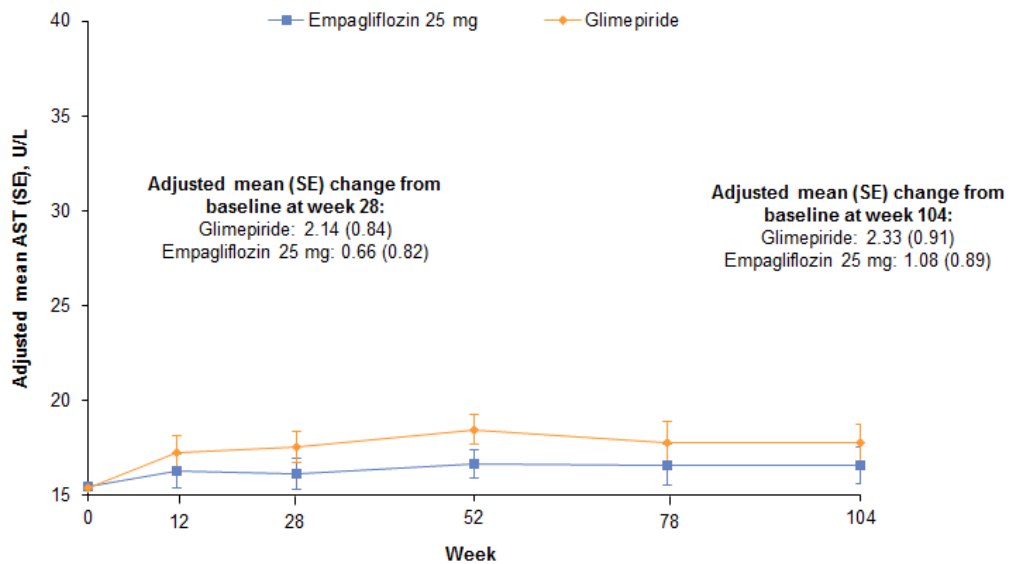

|                         |     |     |     |     |     |     |
|-------------------------|-----|-----|-----|-----|-----|-----|
| Glimepiride (n)         | 233 | 231 | 224 | 219 | 210 | 209 |
| Empagliflozin 25 mg (n) | 245 | 244 | 236 | 226 | 225 | 214 |



**c**

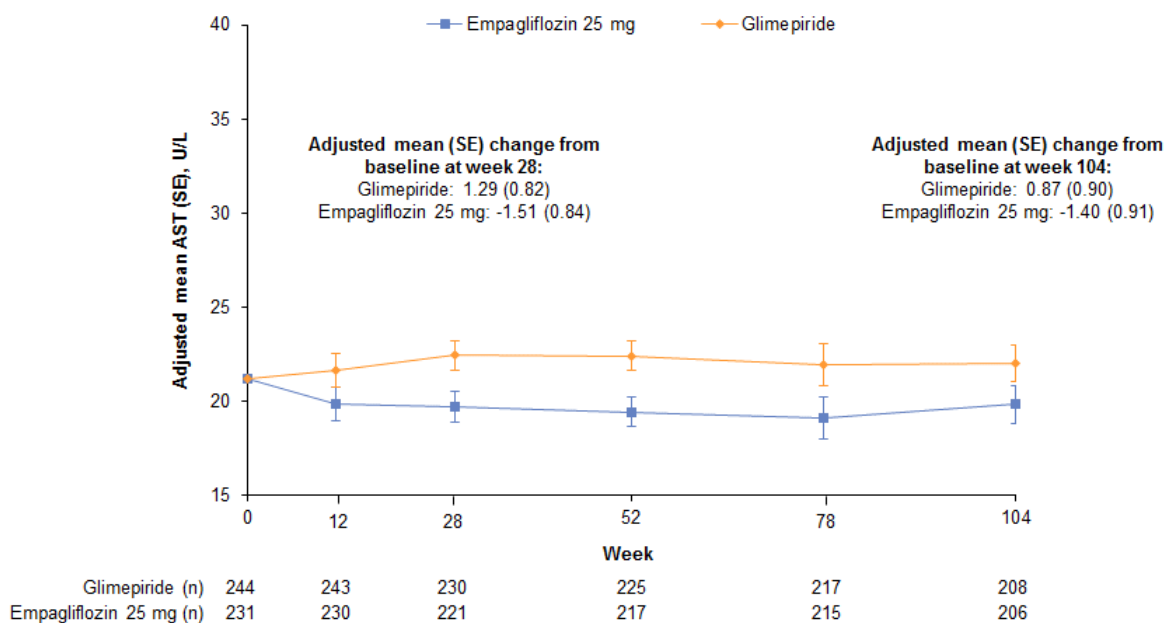

**d**

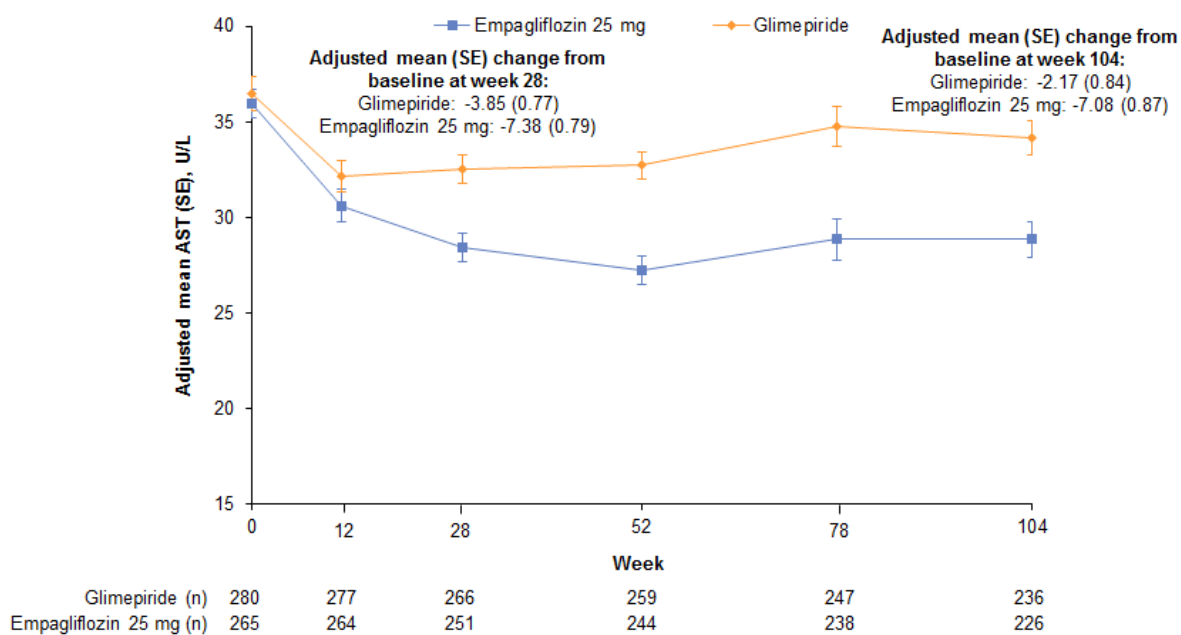

**ESM Figure 5.** Changes in aspartate aminotransferase (AST) in the EMPA-REG H2H-SU trial in (a) all patients and in tertiles of patients by baseline ALT: (b) tertile 1; (c) tertile 2; (d) tertile 3. Mixed model repeated measures analysis in patients treated with  $\geq 1$  dose of study drug based on observed cases, including values after initiation of rescue medication. Baseline values are mean (SE). SE, standard error
